# Supplementary material for: Comparison of probiotic yogurt and ordinary yogurt consumption on serum Pentraxin3, NT-proBNP, oxLDL, and ApoB100 in patients with chronic heart failure: a randomized, triple-blind, controlled trial
Source: Royal Society of Chemistry journal article supplement (doi:10.1039/d0fo01014f), 2020-01-01
Supplement: d0fo01014f1.pdf [file d0fo01014f1.pdf]

**Supplemental Table 1.** Anthropometric and Physical activity measurements at baseline and week 10.

| <b>Variables</b>                              |                 | <b>Probiotic yogurt group<br/>(n=39)</b> | <b>Ordinary yogurt group<br/>(n=39)</b> | <b>P-<br/>value</b> |
|-----------------------------------------------|-----------------|------------------------------------------|-----------------------------------------|---------------------|
| <b>Height (cm)</b>                            |                 | 168.00 (162,180)                         | 175.00 (165,180)                        | 0.255 <sup>b</sup>  |
| <b>Weight (kg)</b>                            | <b>Baseline</b> | 74.62 ± 10.26                            | 76.10 ± 11.44                           | 0.550 <sup>a</sup>  |
|                                               | <b>Week 10</b>  | 74.38 ± 10.26                            | 75.87 ± 11.38                           | 0.546 <sup>a</sup>  |
| <b>Body Mass Index<br/>(kg/m<sup>2</sup>)</b> | <b>Baseline</b> | 26.61 (24.69,27.42)                      | 26.25 (23.43,27.77)                     | 0.912 <sup>b</sup>  |
|                                               | <b>Week 10</b>  | 26.17 (24.50,28.19)                      | 26.17 (23.06,28.00)                     | 0.807 <sup>b</sup>  |
| <b>Physical activity<br/>(MET-min/week)</b>   | <b>Baseline</b> | 878.00 (577.00,2074.00)                  | 800.00 (99.00,2497.00)                  | 0.664 <sup>b</sup>  |
|                                               | <b>Week 10</b>  | 746.00 (470.00,2022.00)                  | 800.00 (330.00,1912.00)                 | 0.869 <sup>b</sup>  |

Note: Data are presented as mean (SD) for Parametric quantitative data and median (25th and 75th percentile) for nonparametric quantitative data.

<sup>a</sup> P value for between-group comparison of parametric quantitative data using independent-sample t-test.

<sup>b</sup> P value for between-group comparison of nonparametric quantitative data using Mann–Whitney U-test.

**Supplemental Table 2** Intake of energy and some nutrients in the study groups at the baseline and after 10 weeks.

| Items                                    | Baseline                         |                                 |                     | After 10 weeks                   |                                 |                     |
|------------------------------------------|----------------------------------|---------------------------------|---------------------|----------------------------------|---------------------------------|---------------------|
|                                          | Probiotic yogurt group<br>(n=39) | Ordinary yogurt group<br>(n=39) | <i>P</i> -<br>value | Probiotic yogurt group<br>(n=39) | Ordinary yogurt group<br>(n=39) | <i>P</i> -<br>value |
| <b>Energy (kcal/d)</b>                   |                                  |                                 | 0.656               |                                  |                                 | 0.745               |
|                                          | 1473.50(1385.00,1591.00)         | 1493.50(1329.00,1875.50)        | b                   | 1471.50(1273.00,1616.50)         | 1423.50(1297.00,1593.00)        | b                   |
| <b>Total protein<br/>(g/d)</b>           | 64.87(55.38,79.60)               | 77.69(59.60,86.09)              | 0.054               | 60.20 ± 17.49                    | 64.02 ± 14.62                   | 0.298               |
|                                          |                                  |                                 | b                   |                                  |                                 | b                   |
| <b>Total<br/>carbohydrates<br/>(g/d)</b> | 218.80(184.55,253.95)            | 202.40(180.45,279.10)           | 0.532               | 208.89 ± 49.39                   | 213.27 ± 42.70                  | 0.676               |
|                                          |                                  |                                 | b                   |                                  |                                 | a                   |
| <b>Total fat (g/d)</b>                   | 41.24(31.39,47.95)               | 44.82(38.41,51.60)              | 0.083               | 43.66 ± 12.93                    | 42.63 ± 15.56                   | 0.752               |
|                                          |                                  |                                 | b                   |                                  |                                 | a                   |
| <b>SFA (g/d)</b>                         | 12.18 ± 3.71                     | 13.79 ± 4.87                    | 0.106               | 10.45(9.11,14.98)                | 11.49(9.88,13.90)               | 0.730               |
|                                          |                                  |                                 | a                   |                                  |                                 | b                   |
| <b>MUFA (g/d)</b>                        | 12.94(11.19,16.29)               | 14.92(12.71,18.91)              | <b>0.037</b>        | 15.52 ± 5.74                     | 14.61 ± 6.72                    | 0.521               |
|                                          |                                  |                                 | b                   |                                  |                                 | a                   |
| <b>PUFA (g/d)</b>                        | 9.03(5.37,11.78)                 | 8.22(7.22,10.98)                | 0.387               | 9.88 ± 4.23                      | 8.98 ± 4.52                     | 0.366               |
|                                          |                                  |                                 | b                   |                                  |                                 | a                   |
| <b>Cholesterol<br/>(mg/d)</b>            | 182.50 (133.65,283.28)           | 231.00 (196.10,325.95)          | <b>0.027</b>        | 209.45 (111.51,280.25)           | 175.95 (119.39,221.90)          | 0.163               |
|                                          |                                  |                                 | b                   |                                  |                                 | b                   |
| <b>Fiber (g/d)</b>                       | 12.87 (9.56,17.77)               | 14.00 (9.49,14,76)              | 0.932               | 12.85 ± 4.23                     | 14.11 ± 5.03                    | 0.234               |

|                             |                           |                           |              |                           |                           |       |
|-----------------------------|---------------------------|---------------------------|--------------|---------------------------|---------------------------|-------|
|                             |                           |                           | b            |                           |                           | a     |
| <b>Sodium (mg/d)</b>        | 1049.45 (779.60,1561.50)  | 979.90 (743.10,1271.10)   | 0.292        | 833.45 (629.45,1246.00)   | 825.70 (666.55,1153.65)   | 0.940 |
|                             |                           |                           | b            |                           |                           | b     |
| <b>Potassium (mg/d)</b>     | 2005.50 (1431.50,2593.00) | 2147.50 (1783.00,2748.00) | 0.163        | 2012.00 (1352.00,2371.00) | 1930.00 (1496.00,2360.50) | 0.838 |
|                             |                           |                           | b            |                           |                           | b     |
| <b>Iron (mg/d)</b>          | 14.19 (9.88,21.03)        | 14.58 (9.59,19.56)        | 0.723        | 15.50 (9.27,18.82)        | 13.17 (10.96,16.71)       | 0.664 |
|                             |                           |                           | b            |                           |                           | b     |
| <b>Magnesium (mg/d)</b>     | 173.60 (116.70,201.55)    | 191.35 (147.00,211.85)    | 0.182        | 171.35 (118.33,192.35)    | 160.77 (142.60,228.90)    | 0.236 |
|                             |                           |                           | b            |                           |                           | b     |
| <b>Vitamin B1 (mg/d)</b>    | 1.40 (1.24,1.64)          | 1.35 (1.20,1.69)          | 0.667        | 1.38 ± 0.27               | 1.43 ± 0.31               | 0.670 |
|                             |                           |                           | b            |                           |                           | a     |
| <b>Vitamin B9 (Ug/d)</b>    | 189.65 (127.80,293.30)    | 190.10 (140.05,267.75)    | 0.614        | 190.05 (101.68,284.00)    | 202.40 (129.18,318.85)    | 0.182 |
|                             |                           |                           | b            |                           |                           | b     |
| <b>Beta-carotene (Ug/d)</b> | 129.86 (79.50,526.93)     | 186.05 (77.76,380.55)     | 0.693        | 111.24 (56.43,303.90)     | 181.130 (55.01,284.45)    | 0.593 |
|                             |                           |                           | b            |                           |                           | b     |
| <b>Calcium (mg/d)</b>       | 489.72 ± 159.22           | 576.61 ± 145.93           | <b>0.014</b> | 454.53 ± 165.31           | 486.81 ± 146.85           | 0.365 |
|                             |                           |                           | a            |                           |                           | a     |

Note: Data are presented as mean (SD) for Parametric quantitative data and median (25th and 75th percentile) for nonparametric quantitative data.

<sup>a</sup> P value for between-group comparison of parametric quantitative data using independent-sample t-test.

<sup>b</sup> P value for between-group comparison of nonparametric quantitative data using Mann–Whitney U-test.

Abbreviations: SFA, Saturated fatty acid; MUFA, Mono unsaturated fatty acid; PUFA, Poly unsaturated fatty acid.

Bold P-values are statistically significant (<0.05)

### Supplemental Table 3. Medications intake by participants during the study

---

#### Groups

| Medication            | Dose/day   |                                  |                                 | P-value |
|-----------------------|------------|----------------------------------|---------------------------------|---------|
|                       |            | Probiotic yogurt group<br>(n=39) | Ordinary yogurt group<br>(n=39) |         |
| Furosemide, n (%)     | Not taking | 17 (43.6)                        | 16 (41.0)                       | 0.985*  |
|                       | 20 mg      | 7 (17.9)                         | 8 (20.5)                        |         |
|                       | 40 mg      | 5 (12.8)                         | 7 (17.9)                        |         |
|                       | 60 mg      | 3 (7.7)                          | 3 (7.7)                         |         |
|                       | 80 mg      | 5 (12.8)                         | 4 (10.3)                        |         |
|                       | 160 mg     | 2 (5.1)                          | 1 (2.6)                         |         |
| Warfarin, n (%)       | Not taking | 35 (89.7)                        | 34 (87.2)                       | 1.00*   |
|                       | 5 mg       | 2 (5.1)                          | 3 (7.7)                         |         |
|                       | 25 mg      | 2 (5.1)                          | 2 (5.1)                         |         |
| Spironolactone, n (%) | Not taking | 15 (38.5)                        | 10 (25.6)                       | 0.368*  |
|                       | 12.5 mg    | 3 (7.7)                          | 1 (2.6)                         |         |
|                       | 25 mg      | 20 (51.3)                        | 24 (61.5)                       |         |
|                       | 50 mg      | 1 (2.6)                          | 3 (7.7)                         |         |
|                       | 75mg       | 0 ( 0)                           | 1 (2.6)                         |         |
| Valsartan, n (%)      | No taking  | 29 (74.4)                        | 30 (76.9)                       | 0.859*  |
|                       | 80 mg      | 5 (12.8)                         | 3 (7.7)                         |         |

|                            |                  |           |           |        |
|----------------------------|------------------|-----------|-----------|--------|
|                            | <b>160 mg</b>    | 5 (12.8)  | 6 (15.4)  |        |
| <b>Carvedilol, n (%)</b>   | <b>No taking</b> | 20 (51.3) | 17 (43.6) | 0.895* |
|                            | <b>6.25 mg</b>   | 11 (28.2) | 11 (28.2) |        |
|                            | <b>12.5 mg</b>   | 6 (15.4)  | 7 (17.9)  |        |
|                            | <b>25 mg</b>     | 2 (5.1)   | 3 (7.7)   |        |
|                            | <b>37.5 mg</b>   | 0 (0)     | 1 (2.6)   |        |
| <b>Atorvastatin, n (%)</b> | <b>No taking</b> | 18 (46.2) | 21 (53.8) | 0.702* |
|                            | <b>20 mg</b>     | 18 (46.2) | 14 (35.9) |        |
|                            | <b>40 mg</b>     | 3 (7.7)   | 4 (10.3)  |        |
| <b>Lisinopril, n (%)</b>   | <b>No taking</b> | 23 (59.0) | 18 (46.2) | 0.732* |
|                            | <b>2.5 mg</b>    | 2 (5.1)   | 2 (5.1)   |        |
|                            | <b>5 mg</b>      | 8 (20.5)  | 11 (28.2) |        |
|                            | <b>10 mg</b>     | 6 (15.4)  | 8 (20.5)  |        |
| <b>Eplerenone, n (%)</b>   | <b>No taking</b> | 36 (92.3) | 36 (92.3) | 1.00*  |
|                            | <b>25 mg</b>     | 2 (5.1)   | 1 (2.6)   |        |
|                            | <b>50 mg</b>     | 1 (2.6)   | 2 (5.1)   |        |

|                           |                  |           |           |        |
|---------------------------|------------------|-----------|-----------|--------|
| <b>Aspirin, n (%)</b>     | <b>No taking</b> | 16 (41.0) | 18 (46.2) | 0.648* |
|                           | <b>80 mg</b>     | 23 (59.0) | 21 (53.8) |        |
| <b>Hydralazine, n (%)</b> | <b>No taking</b> | 37 (94.9) | 37 (94.9) | 1.00*  |
|                           | <b>25 mg</b>     | 2 (5.1)   | 2 (5.1)   |        |
| <b>Losartan, n (%)</b>    | <b>No taking</b> | 36 (92.3) | 38 (97.4) | 0.615* |
|                           | <b>50 mg</b>     | 1 (2.6)   | 0 (0)     |        |
|                           | <b>100 mg</b>    | 2 (5.1)   | 1 (2.6)   |        |
| <b>Metoprolol, n (%)</b>  | <b>NO taking</b> | 31 (79.5) | 35 (89.7) | 0.209* |
|                           | <b>100 mg</b>    | 8 (20.5)  | 4 (10.3)  |        |
| <b>Bisoprolol, n (%)</b>  | <b>No taking</b> | 28 (71.8) | 28 (71.8) | *1.00  |
|                           | <b>2.5 mg</b>    | 6 (15.4)  | 7 (17.9)  |        |
|                           | <b>5 mg</b>      | 5 (12.8)  | 4 (10.3)  |        |

\*: *P* value for between-group comparison of qualitative data using Chi-square or Fisher's exact test.
